# Supplementary figures and images for: The Role of Selenoproteins SELENOM and SELENOT in the Regulation of Apoptosis, ER Stress, and Calcium Homeostasis in the A-172 Human Glioblastoma Cell Line
Source: MDPI journal article supplement (doi:10.3390/biology11060811), 2022-05-25

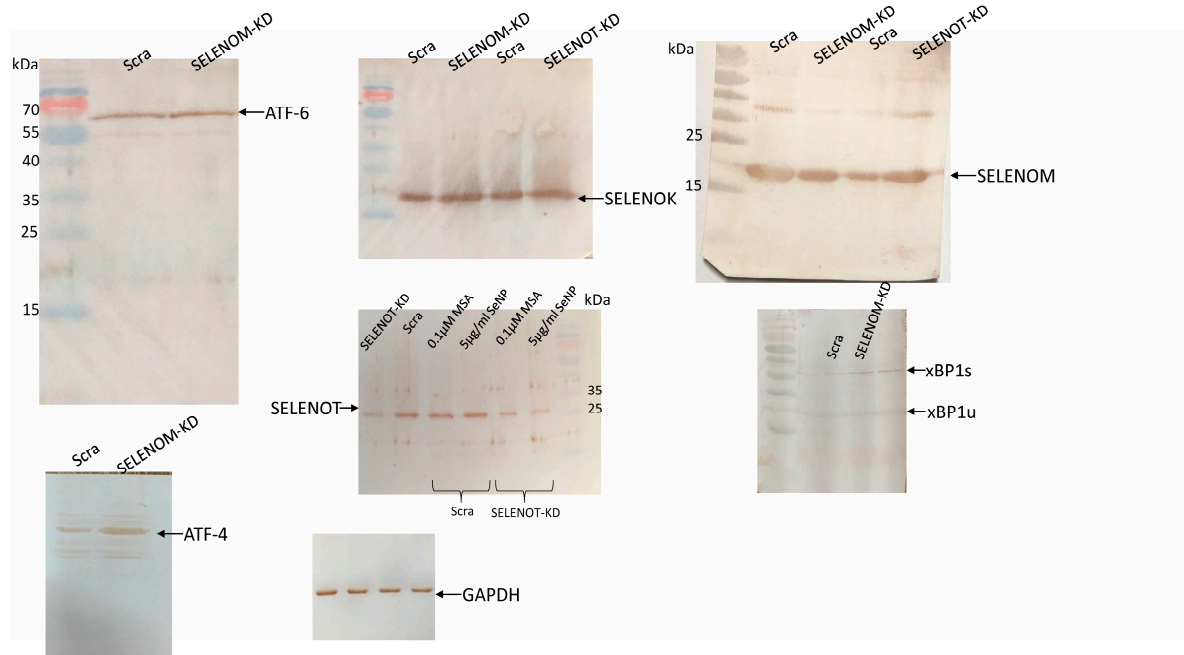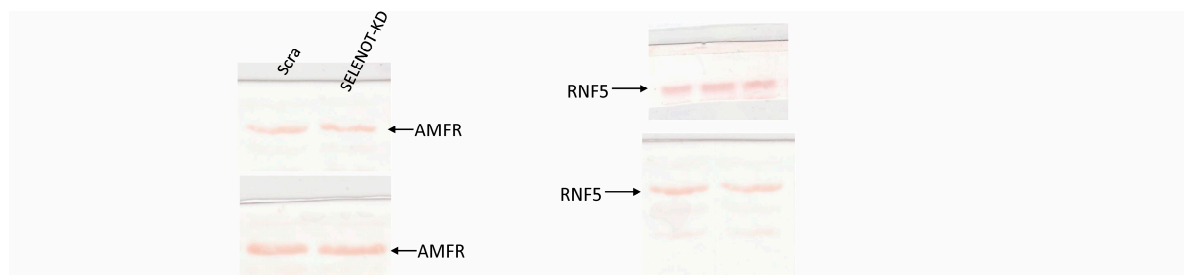

**Figure S1.** Original images of FullWestern Blot.

Supplement: s1 [file s1]
